# Supplementary material for: Effects of red fox urine on foraging behavior in forest and residential populations of nocturnal rodents.
Source: MDPI journal article supplement (doi:10.3390/ma16114084), 2010-01-01
Supplement: s1 [file s1]

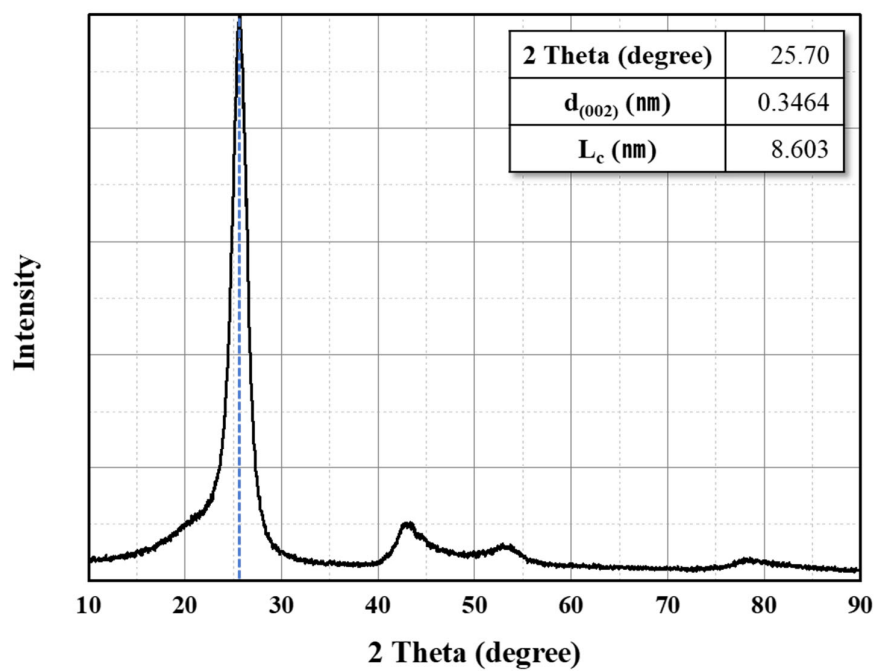

Figure S1. XRD pattern of regular coke used as the filler.

**Table S1.** Mixing ratio of the filler coke and binder pitch to prepare the carbon blocks.

| Binder mixing<br>ratio (vol.%) | C60      |           | C40      |           | C20      |           |
|--------------------------------|----------|-----------|----------|-----------|----------|-----------|
|                                | Coke (g) | Pitch (g) | Coke (g) | Pitch (g) | Coke (g) | Pitch (g) |
| 10                             | 9.3138   | 0.6862    | 9.3158   | 0.6842    | —        | —         |
| 15                             | 8.9525   | 1.0475    | 8.9554   | 1.0446    | 8.9622   | 1.0378    |
| 20                             | 8.5781   | 1.4219    | 8.5819   | 1.4181    | 8.5907   | 1.4093    |
| 25                             | 8.1899   | 1.8101    | 8.1946   | 1.8054    | 8.2052   | 1.7948    |
| 30                             | 7.7872   | 2.2128    | 7.7926   | 2.2074    | 7.8050   | 2.1950    |
| 35                             | 7.3690   | 2.6310    | 7.3752   | 2.6248    | 7.3891   | 2.6109    |
| 40                             | —        | —         | 6.9414   | 3.0586    | 6.9567   | 3.0433    |
| 45                             | —        | —         | —        | —         | 6.5066   | 3.4934    |

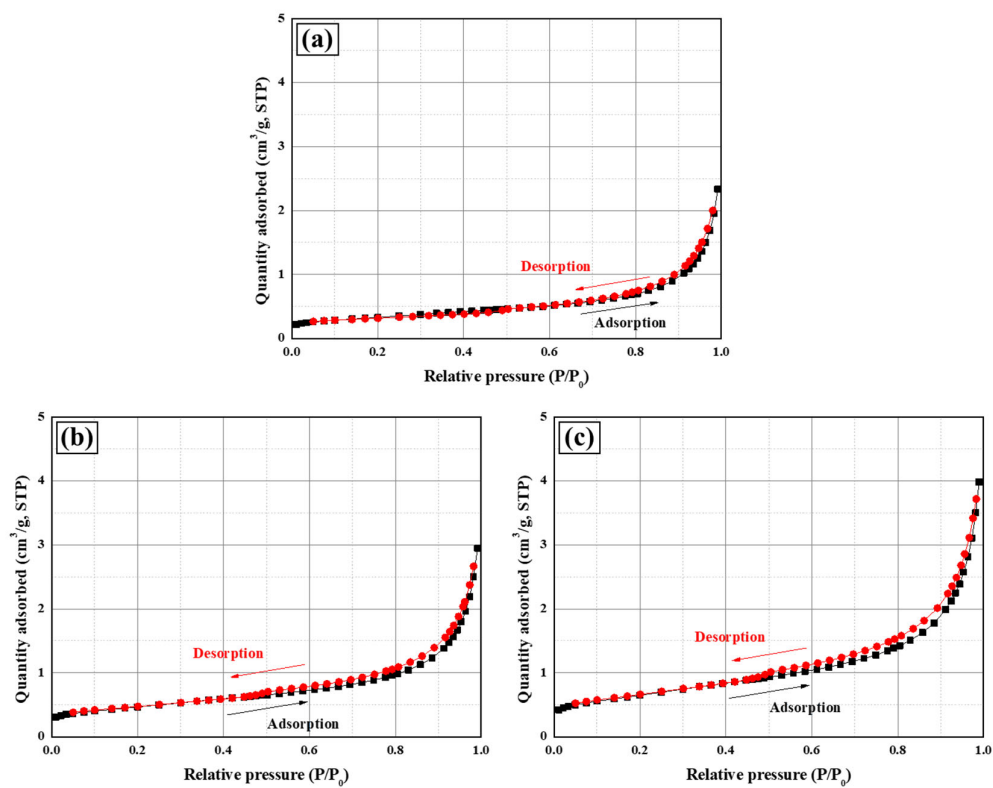

**Figure S2.** Nitrogen adsorption-desorption isotherms of the prepared coke particles using (a) C60, (b) C40, and (c) C20 fillers.

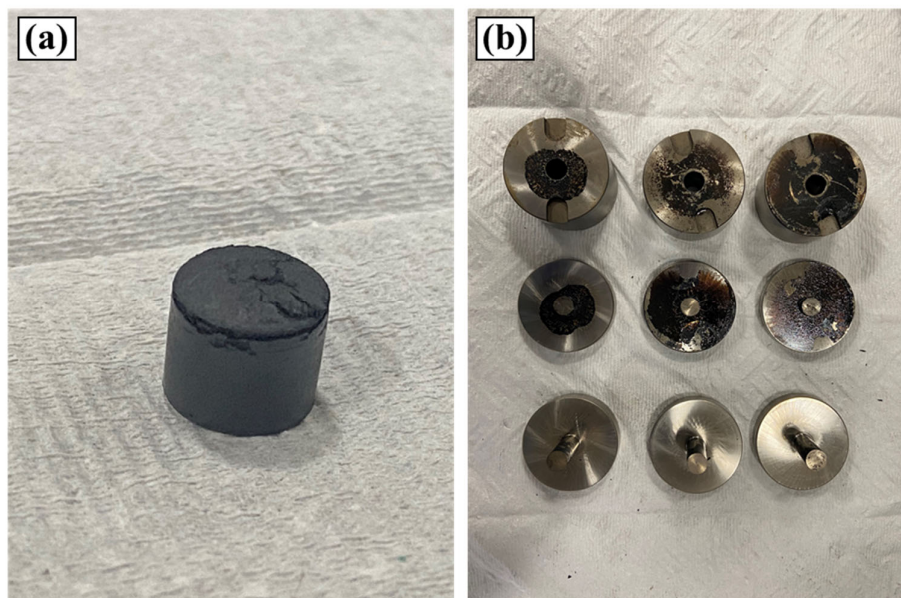

**Figure S3.** Carbon block and mold in an unformed condition; (a) Cracked block based with insufficient binder, (b) Binder leaking from the gaps of the molds with excessive binder.
